# Supplementary material for: Genomic profiling of pediatric hematologic malignancies and diagnosis of cancer predisposition syndromes: tumor-only versus paired tumor-normal sequencing
Source: PubMed Central journal article supplement — Haematologica. 2024 Feb 22;109(9):3024–30. doi: 10.3324/haematol.2023.284855 (PMC11367190; doi:10.3324/haematol.2023.284855), 2024-02-22
Supplement: 2023_284855_NEWMAN_SUPPL.pdf [file 2023_284855_NEWMAN_SUPPL.pdf]

# Genomic profiling of pediatric hematologic malignancies and diagnosis of cancer predisposition syndromes: tumor-only *versus* paired tumor-normal sequencing

## Authors

---

Haley Newman,<sup>1,2</sup> Mary Egan Clark,<sup>1</sup> Derek Wong,<sup>3</sup> Jinhua Wu,<sup>3</sup> Garrett M. Brodeur,<sup>1,2,4</sup> Stephen P. Hunger,<sup>1,2,4</sup> Sarah K. Tasian,<sup>1,2,4</sup> Timothy Olson,<sup>1,2,4</sup> Julia T. Warren,<sup>2,5</sup> David T. Teachey,<sup>1,2,4</sup> Kira Bona,<sup>6</sup> Jeffrey Schubert,<sup>3</sup> Netta Golenberg,<sup>3</sup> Maha Patel,<sup>3</sup> Elizabeth H. Denenberg,<sup>3</sup> Elizabeth A. Fanning,<sup>3</sup> Jiani Chen,<sup>3</sup> Tamara Luke,<sup>3</sup> Sarah Charles,<sup>3</sup> Daniel Gallo,<sup>3</sup> Kajia Cao,<sup>3</sup> Weixuan Fu,<sup>3</sup> Zhiqian Fan,<sup>3</sup> Lea F. Surrey,<sup>2,3</sup> Gerald Wertheim,<sup>2,3</sup> Minjie Luo,<sup>2,3</sup> Suzanne P. MacFarland,<sup>1,2,4</sup> Marilyn M. Li<sup>1,2,3</sup> and Yiming Zhong<sup>2,3</sup>

<sup>1</sup>Division of Oncology, Department of Pediatrics, Children's Hospital of Philadelphia, Philadelphia, PA; <sup>2</sup>Perelman School of Medicine,

University of Pennsylvania, Philadelphia, PA; <sup>3</sup>Department of Pathology and Laboratory Medicine, Children's Hospital of Philadelphia, Philadelphia, PA; <sup>4</sup>Center for Childhood Cancer Research, Children's Hospital of Philadelphia, Philadelphia, PA; <sup>5</sup>Division of Hematology, Department of Pediatrics, Children's Hospital of Philadelphia, Philadelphia, PA and <sup>6</sup>Department of Pediatric Oncology, Division of Population Sciences, Dana-Farber Cancer Institute, Boston, MA, USA

Correspondence:

Y. ZHONG - zhongy1@chop.edu

<https://doi.org/10.3324/haematol.2023.284855>

**Supplemental Table 1. Demographics of study cohort**

|                                             | All<br>N=1190 | Tumor testing<br>N=1034 | Paired Tumor-Normal testing<br>N=156 |
|---------------------------------------------|---------------|-------------------------|--------------------------------------|
| Age<br>Median age, years (range)            | 9.2 (0-32)    | 9.5 (0-32)              | 6.4 (0-22)                           |
| Sex, No (%)                                 |               |                         |                                      |
| Female                                      | 546(46)       | 470 (46)                | 76 (49)                              |
| Male                                        | 643(54)       | 563 (55)                | 80 (51)                              |
| Race, No (%) <sup>a</sup>                   |               |                         |                                      |
| White                                       | 449 (38)      | 363 (35)                | 86 (55)                              |
| Black or African American                   | 114 (10)      | 88 (9)                  | 26 (17)                              |
| Asian                                       | 34 (3)        | 25 (2)                  | 9 (6)                                |
| Other                                       | 160 (13)      | 125 (2)                 | 35 (22)                              |
| Diagnosis, No (%)                           |               |                         |                                      |
| B-ALL                                       | 704 (59)      | 609 (59)                | 95 (61)                              |
| AML/myeloid sarcoma                         | 212 (18)      | 178 (17)                | 34 (22)                              |
| T-ALL/T-TLL                                 | 108 (9)       | 95 (9)                  | 13 (8)                               |
| NHL <sup>b</sup>                            | 68 (6)        | 63 (6)                  | 5 (3)                                |
| Predisposition to MDS/Leukemia <sup>c</sup> | 27 (2)        | 26 (3)                  | 1 (1)                                |
| MPN <sup>d</sup>                            | 36 (3)        | 30 (3)                  | 6(4)                                 |
| Other <sup>e</sup>                          | 35 (3)        | 33 (3)                  | 2(1)                                 |

<sup>a</sup>432 patients with tumor-only testing missing self-identified race data

<sup>b</sup>NHL=Diffuse large B-cell Lymphoma (DLBCL), Follicular lymphoma, Anaplastic large cell lymphoma (ALCL), Primary mediastinal b-cell lymphoma (PMBCL)

<sup>c</sup>Predisposition to MDS/leukemia= Schwachman Diamond Syndrome, Fanconi anemia, Telomere biology disorder, Severe Congenital Neutropenia with *ELANE* mutation, mosaic Trisomy 8, Diamond-Blackfan anemia, *GATA2* haploinsufficiency syndrome, Noonan Syndrome *PTPN11*, MECOM-associated bone marrow failure syndrome

<sup>d</sup>MPN=Chronic myeloid leukemia (CML), Transient myeloid leukemia of Down's Syndrome (TMD), Juvenile monomyelocytic anemia (JMML)

<sup>e</sup>Other = myelodysplasia (MDS), mixed phenotype acute leukemia/ambiguous lineage leukemia (MPAL/AUL), Hodgkin lymphoma

**Supplemental table 2.** All variants identified by somatic testing as potentially germline or confirmed as germline on Tumor/Normal (T/N) testing.

| Gene          | Transcript     | Nucleotide      | Amino Acid           | Mutation type | VAF  | Test (somatic or T/N) | Germline Confirmation |
|---------------|----------------|-----------------|----------------------|---------------|------|-----------------------|-----------------------|
| <i>TP53</i>   | NM_000546.5    | c.659A>G        | p.Tyr220Cys          | missense      | 0.44 | somatic               | Unknown               |
| <i>TP53</i>   | NM_000546.5    | c.1009C>T       | p.Arg337Cys          | missense      | 0.51 | somatic               | Unknown               |
| <i>NRAS</i>   | NM_002524.4    | c.178G>A        | p.Gly60Arg           | missense      | 0.43 | somatic               | Unknown               |
| <i>DDX41</i>  | NM_016222.3    | c.4G>T          | p.Glu2*              | nonsense      | 0.23 | somatic               | Unknown               |
| <i>PHF6</i>   | NM_032458.2    | c.890G>A        | p.Cys297Tyr          | missense      | 0.38 | somatic               | Unknown               |
| <i>RUNX1</i>  | NM_001754.4    | c.334del        | p.Leu112Cysfs*10     | frameshift    | 0.42 | somatic               | Unknown               |
| <i>PTPN11</i> | NM_002834.4    | c.181G>A        | p.Asp61Asn           | missense      | 0.45 | somatic               | Positive              |
| <i>IKZF1</i>  | NM_006060.5    | c.475A>T        | p.Asn159Tyr          | missense      | 0.42 | somatic               | Unknown               |
| <i>RBI</i>    | NM_000321.2    | c.1362C>G       | p.Tyr454*            | nonsense      | 0.39 | somatic               | Unknown               |
| <i>GATA2</i>  | NM_001145661.1 | c.521del        | p.Pro174Hisfs*44     | frameshift    | 0.44 | somatic               | Unknown               |
| <i>RUNX1</i>  | NM_001754.4    | c.805+1del      | p.?                  | splice_site   | 0.44 | somatic               | Unknown               |
| <i>CSF3R</i>  | NM_000760.3    | c.1640G>A       | p.Trp547*            | nonsense      | 0.47 | somatic               | Unknown               |
| <i>ETV6</i>   | NM_001987.4    | c.865C>T        | p.Gln289*            | nonsense      | 0.49 | somatic               | Unknown               |
| <i>ETV6</i>   | NM_001987.4    | c.1014_1020del  | p.Arg339Phefs*30     | frameshift    | 0.68 | somatic               | Unknown               |
| <i>TP53</i>   | NM_000546.5    | c.614A>G        | p.Tyr205Cys          | missense      | 0.83 | somatic               | Unknown               |
| <i>NF1</i>    | NM_001042492.2 | c.6855C>A       | p.Tyr2285*           | nonsense      | 0.94 | somatic               | Unknown               |
| <i>RTEL1</i>  | NM_016434.3    | c.897del        | p.Phe299Leufs*10     | frameshift    | 0.39 | somatic               | Unknown               |
| <i>ETV6</i>   | NM_001987.4    | c.1202A>G       | p.Tyr401Cys          | missense      | 0.61 | somatic               | Positive              |
| <i>CDKN2A</i> | NM_000077.4    | c.377T>A        | p.Val126Asp          | missense      | 0.74 | somatic               | Unknown               |
| <i>ETV6</i>   | NM_001987.4    | c.416_417del    | p.Ser139Tyrf*14      | frameshift    | 0.54 | TN                    | Positive              |
| <i>GATA2</i>  | NM_001145661.1 | c.1085G>A       | p.Arg362Gln          | missense      | 0.5  | TN                    | Positive              |
| <i>NF1</i>    | NM_001042492.2 | c.1260+1del     | p.?                  | splice_site   | 0.25 | somatic               | Unknown               |
| <i>TP53</i>   | NM_000546.5    | c.1045G>T       | p.Glu349*            | nonsense      | 0.83 | somatic               | Unknown               |
| <i>CEBPA</i>  | NM_004364.4    | c.162dup        | p.Ile55Hisfs*53      | frameshift    | 0.45 | somatic               | Unknown               |
| <i>CEBPA</i>  | NM_004364.4    | c.938_939insTCT | p.Lys313delinsAsnLeu | inframe       | 0.4  | somatic               | Unknown               |
| <i>WT1</i>    | NM_024426.5    | c.1297T>A       | p.Cys433Ser          | missense      | 0.76 | somatic               | Unknown               |

|               |                |                     |                     |             |      |         |          |
|---------------|----------------|---------------------|---------------------|-------------|------|---------|----------|
| <i>GATA2</i>  | NM_001145661.1 | c.989_992dup        | p.Leu332Thrfs*53    | frameshift  | 0.41 | somatic | Positive |
| <i>PTPN11</i> | NM_002834.4    | c.1504T>C           | p.Ser502Pro         | missense    | 0.34 | somatic | Unknown  |
| <i>PTPN11</i> | NM_002834.4    | c.182A>C            | p.Asp61Ala          | missense    | 0.47 | somatic | Unknown  |
| <i>RUNX1</i>  | NM_001754.4    | c.437A>T            | p.Asn146Ile         | missense    | 0.45 | TN      | Positive |
| <i>CEBPA</i>  | NM_004364.5    | c.68dup             | p.His24Thrfs*136    | frameshift  | 0.34 | TN      | Positive |
| <i>JAK2</i>   | NM_004972.4    | c.2600G>A           | p.Arg867Gln         | missense    | 0.37 | somatic | Unknown  |
| <i>KRAS</i>   | NM_004985.5    | c.35G>C             | p.Gly12Ala          | missense    | 0.38 | somatic | Unknown  |
| <i>SH2B3</i>  | NM_005475.3    | c.622G>C            | p.Glu208Gln         | missense    | 0.52 | somatic | Unknown  |
| <i>NF1</i>    | NM_001042492.3 | c.6855C>A           | p.Tyr2285*          | nonsense    | 0.45 | somatic | Unknown  |
| <i>TP53</i>   | NM_000546.6    | c.976G>T            | p.Glu326*           | nonsense    | 0.76 | somatic | Unknown  |
| <i>PAX5</i>   | NM_016734.3    | c.295dup            | p.Ile99Asnfs*3      | frameshift  | 0.32 | somatic | Unknown  |
| <i>GATA2</i>  | NM_001145661.1 | c.604_624delinsACTT | p.Ala202Thrfs*2     | frameshift  | 0.22 | somatic | Positive |
| <i>JAK3</i>   | NM_000215.4    | c.307C>T            | p.Arg103Cys         | missense    | 0.45 | somatic | Unknown  |
| <i>KMT2D</i>  | NM_003482.4    | c.7228C>T           | p.Arg2410*          | nonsense    | 0.41 | somatic | Unknown  |
| <i>TP53</i>   | NM_000546.6    | c.818G>A            | p.Arg273His         | missense    | 0.39 | somatic | Positive |
| <i>CREBBP</i> | NM_004380.3    | c.4416G>C           | p.Trp1472Cys        | missense    | 0.45 | somatic | Unknown  |
| <i>PTPN11</i> | NM_002834.5    | c.226G>A            | p.Glu76Lys          | missense    | 0.43 | somatic | Unknown  |
| <i>IKZF1</i>  | NM_006060.6    | c.331C>T            | p.Arg111*           | nonsense    | 0.48 | TN      | Positive |
| <i>ETV6</i>   | NM_001987.5    | c.163+1G>A          | p.?                 | splice_site | 0.48 | somatic | Unknown  |
| <i>NF1</i>    | NM_001042492.2 | c.205-2A>T          | p.?                 | splice_site | 0.36 | somatic | Unknown  |
| <i>NF1</i>    | NM_001042492.2 | c.2033dupC          | p.I679Dfs*21        | frameshift  | 0.35 | somatic | Unknown  |
| <i>NF1</i>    | NM_001042492.2 | c.7909C>T           | p.R2637*            | nonsense    | 0.21 | somatic | Unknown  |
| <i>PTPN11</i> | NM_002834.4    | c.214G>A            | p.A72T              | missense    | 0.41 | somatic | Unknown  |
| <i>PAX5</i>   | NM_016734.2    | c.749dupT           | p.T251Hfs*38        | frameshift  | 0.45 | somatic | Unknown  |
| <i>MSH6</i>   | NM_000179.2    | c.3261dupC          | p.F1088Lfs*5        | frameshift  | 0.46 | somatic | Negative |
| <i>TP53</i>   | NM_000546.5    | c.646G>A            | p.V216M             | missense    | 0.91 | somatic | Negative |
| <i>MSH2</i>   | NM_000251.2    | c.1861C>T           | p.R621*             | nonsense    | 0.87 | somatic | Unknown  |
| <i>TP53</i>   | NM_000546.5    | c.743G>A            | p.R248Q             | missense    | 0.88 | somatic | Unknown  |
| <i>TP53</i>   | NM_000546.5    | c.789_833delinsCCCT | p.Leu264Profs*28    | frameshift  | 0.78 | somatic | Unknown  |
| <i>IKZF1</i>  | NM_006060.5    | c.568_583delinsTTTA | p.G190_H195delinsFN | inframe     | 0.48 | somatic | Unknown  |
| <i>KMT2D</i>  | NM_003482.3    | c.4163G>T           | p.Arg1388Leu        | missense    | 0.55 | somatic | Unknown  |

|               |                |                |                  |             |      |         |          |
|---------------|----------------|----------------|------------------|-------------|------|---------|----------|
| <i>MPL</i>    | NM_005373.2    | c.117G>T       | p.Lys39Asn       | missense    | 0.48 | somatic | Unknown  |
| <i>JAK2</i>   | NM_004972.3    | c.3188G>A      | p.Arg1063His     | missense    | 0.43 | somatic | Unknown  |
| <i>PTPN11</i> | NM_002834.4    | c.923A>G       | p.Asn308Ser      | missense    | 0.46 | somatic | Unknown  |
| <i>MPL</i>    | NM_005373.2    | c.407C>T       | p.Pro136Leu      | missense    | 0.43 | somatic | Unknown  |
| <i>TP53</i>   | NM_000546.5    | c.827C>A       | p.Ala276Asp      | missense    | 0.91 | somatic | Unknown  |
| <i>CSFR3</i>  | NM_000760.3    | c.2221C>T      | p.Gln741*        | nonsense    | 0.78 | somatic | Negative |
| <i>RUNX1</i>  | NM_001754.4    | c.484A>G       | p.Arg162Gly      | missense    | 0.38 | somatic | Negative |
| <i>CBL</i>    | NM_005188.3    | c.1141T>C      | p.Cys381Arg      | missense    | 0.98 | somatic | Positive |
| <i>NF1</i>    | NM_001042492.2 | c.2709G>A      | p.Val903Val      | missense    | 0.27 | somatic | Unknown  |
| <i>NF1</i>    | NM_001042492.2 | c.6147+1G>A    | p.?              | splice_site | 0.2  | somatic | Unknown  |
| <i>PTPN11</i> | NM_002834.4    | c.181G>T       | p.Asp61Tyr       | missense    | 0.43 | somatic | Negative |
| <i>TP53</i>   | NM_000546.5    | c.733G>A       | p.Gly245Ser      | missense    | 0.51 | somatic | Unknown  |
| <i>PAX5</i>   | NM_016734.2    | c.910+1G>A     | p.?              | splice_site | 0.48 | somatic | Unknown  |
| <i>ETV6</i>   | NM_001987.4    | c.463+1G>A     | p.?              | splice_site | 0.6  | somatic | Unknown  |
| <i>IKZF1</i>  | NM_006060.5    | c.484C>T       | p.Arg162Trp      | missense    | 0.9  | somatic | Negative |
| <i>CBL</i>    | NM_005188.3    | c.1100A>C      | p.Gln367Pro      | missense    | 0.92 | somatic | Negative |
| <i>TP53</i>   | NM_000546.5    | c.743G>A       | p.Arg248Gln      | missense    | 0.2  | somatic | Negative |
| <i>CEBPA</i>  | NM_004364.4    | c.52_61dup     | p.Ser21Thrfs*90  | frameshift  | 0.23 | somatic | Unknown  |
| <i>PAX5</i>   | NM_016734.2    | c.239C>G       | p.Pro80Arg       | missense    | 0.38 | somatic | Negative |
| <i>PAX5</i>   | NM_016734.2    | c.103del       | p.Asp35Metfs*2   | frameshift  | 0.41 | somatic | Negative |
| <i>ETV6</i>   | NM_001987.4    | c.613dup       | p.Leu205Profs*12 | frameshift  | 0.39 | somatic | Negative |
| <i>DNMT3A</i> | NM_022552.4    | c.2645G>A      | p.Arg882His      | missense    | 0.45 | somatic | Positive |
| <i>TP53</i>   | NM_000546.5    | NA             | whole_gene       | deletion    | 1    | somatic | Positive |
| <i>NF1</i>    | NM_001042492.2 | c.5327C>A      | p.Ser1776*       | nonsense    | 0.89 | somatic | Unknown  |
| <i>SH2B3</i>  | NM_005475.2    | c.622G>C       | p.Glu208Gln      | missense    | 0.95 | somatic | Unknown  |
| <i>DNM2</i>   | NM_001005360.2 | c.1684_1686del | p.Lys562del      | inframe     | 0.33 | somatic | Unknown  |
| <i>GATA2</i>  | NM_001145661.1 | c.1085G>A      | p.Arg362Gln      | missense    | 0.51 | somatic | Unknown  |
| <i>DDX41</i>  | NM_016222.3    | c.844C>T       | p.Arg282Cys      | missense    | 0.47 | somatic | Unknown  |
| <i>TP53</i>   | NM_000546.5    | c.524G>A       | p.Arg175His      | missense    | 0.9  | somatic | Unknown  |
| <i>PHF6</i>   | NM_032458.2    | c.494del       | p.Gly165Glufs*53 | frameshift  | 0.51 | somatic | Unknown  |
| <i>IKZF1</i>  | NM_006060.5    | c.91A>G        | p.Met31Val       | missense    | 0.5  | somatic | Unknown  |

|               |                |                              |                                   |             |      |         |          |
|---------------|----------------|------------------------------|-----------------------------------|-------------|------|---------|----------|
| <i>DNMT3A</i> | NM_022552.4    | c.2645G>A                    | p.Arg882His                       | missense    | 0.47 | somatic | Unknown  |
| <i>KMT2D</i>  | NM_003482.3    | c.10441-1G>A                 | p.?                               | splice_site | 0.44 | somatic | Unknown  |
| <i>EP300</i>  | NM_001429.3    | c.5403C>A                    | p.Cys1801*                        | nonsense    | 0.39 | somatic | Unknown  |
| <i>NOTCH1</i> | NM_017617.4    | c.5033T>C                    | p.Leu1678Pro                      | missense    | 0.48 | somatic | Unknown  |
| <i>PHF6</i>   | NM_032458.2    | c.820C>T                     | p.Arg274*                         | nonsense    | 0.38 | somatic | Unknown  |
| <i>TP53</i>   | NM_000546.5    | c.916C>T                     | p.Arg306*                         | nonsense    | 0.36 | somatic | Negative |
| <i>TP53</i>   | NM_000546.5    | c.1024C>T                    | p.Arg342*                         | nonsense    | 0.26 | somatic | Negative |
| <i>TP53</i>   | NM_000546.5    | c.646G>A                     | p.Val216Met                       | missense    | 0.97 | somatic | Negative |
| <i>MPL</i>    | NM_005373.2    | c.815G>A                     | p.Trp272*                         | nonsense    | 0.46 | somatic | Unknown  |
| <i>RELN</i>   | NM_005045.3    | c.8433del                    | p.Pro2812Glnfs*16                 | frameshift  | 0.46 | somatic | Unknown  |
| <i>PTPN11</i> | NM_002834.4    | c.226G>A                     | p.Glu76Lys                        | missense    | 0.43 | somatic | Unknown  |
| <i>ETV6</i>   | NM_001987.4    | c.460_461dup                 | p.Asp155Lysfs*55                  | frameshift  | 0.15 | somatic | Unknown  |
| <i>NF1</i>    | NM_001042492.2 | c.7271_7272del               | p.Arg2424Lysfs*3                  | frameshift  | 0.34 | somatic | Unknown  |
| <i>NF1</i>    | NM_001042492.2 | c.7271_7272del               | p.Arg2424Lysfs*3                  | frameshift  | 0.34 | somatic | Unknown  |
| <i>TP53</i>   | NM_000546.5    | c.742C>T                     | p.Arg248Trp                       | missense    | 0.38 | somatic | Unknown  |
| <i>TP53</i>   | NM_000546.5    | c.742C>T                     | p.Arg248Trp                       | missense    | 0.38 | somatic | Unknown  |
| <i>CREBBP</i> | NM_004380.2    | c.1409T>A                    | p.Leu470*                         | nonsense    | 0.35 | somatic | Unknown  |
| <i>TP53</i>   | NM_000546.5    | c.818G>A                     | p.Arg273His                       | missense    | 0.62 | somatic | Negative |
| <i>BCL11B</i> | NM_138576.3    | c.1942_1956delinsCCGGTCGCATT | p.Gly648Profs*74                  | frameshift  | 0.38 | somatic | Unknown  |
| <i>JAK3</i>   | NM_000215.3    | c.1718C>T                    | p.Ala573Val                       | missense    | 0.43 | somatic | Unknown  |
| <i>NOTCH1</i> | NM_017617.4    | c.7072G>A                    | p.Ala2358Thr                      | missense    | 0.53 | somatic | Unknown  |
| <i>NOTCH1</i> | NM_017617.4    | c.6392del                    | p.Gly2131Alafs*117                | frameshift  | 0.41 | somatic | Unknown  |
| <i>KRAS</i>   | NM_004985.4    | c.187G>A                     | p.Glu63Lys                        | missense    | 0.89 | somatic | Negative |
| <i>IKZF1</i>  | NM_006060.5    | c.475A>T                     | p.Asn159Tyr                       | missense    | 0.47 | somatic | Negative |
| <i>CBL</i>    | NM_005188.3    | c.1228-2A>G                  | p.?                               | splice_site | 0.9  | somatic | Negative |
| <i>TP53</i>   | NM_000546.5    | c.818G>A                     | p.Arg273His                       | missense    | 0.37 | somatic | Negative |
| <i>NF1</i>    | NM_001042492.2 | c.7189G>T                    | p.Gly2397Trp                      | missense    | 0.78 | somatic | Unknown  |
| <i>PTPN11</i> | NM_002834.4    | c.215C>T                     | p.Ala72Val                        | missense    | 0.44 | somatic | Unknown  |
| <i>CEBPA</i>  | NM_004364.4    | c.333_334dup                 | p.Pro112Argfs*49                  | frameshift  | 0.48 | somatic | Negative |
| <i>CEBPA</i>  | NM_004364.4    | c.941_942ins15               | p.Val314_Leu315insSerSerGlnLysVal | inframe     | 0.34 | somatic | Negative |
| <i>CEBPA</i>  | NM_004364.4    | c.937_939dup                 | p.Lys313dup                       | inframe     | 0.38 | somatic | Unknown  |

|               |                |                     |                         |             |      |         |          |
|---------------|----------------|---------------------|-------------------------|-------------|------|---------|----------|
| <i>CEBPA</i>  | NM_004364.4    | c.245del            | p.Phe82Serfs*78         | frameshift  | 0.4  | somatic | Unknown  |
| <i>MSH2</i>   | NM_000251.2    | NA                  | exon_12_16              | deletion    | 0.5  | somatic | Unknown  |
| <i>CSF3R</i>  | NM_000760.3    | c.799del            | p.Glu267Serfs*61        | frameshift  | 0.48 | somatic | Unknown  |
| <i>IKZF1</i>  | NM_006060.5    | c.484C>T            | p.Arg162Trp             | missense    | 0.44 | somatic | Unknown  |
| <i>JAK2</i>   | NM_004972.3    | c.2047A>G           | p.Arg683Gly             | missense    | 0.38 | somatic | Unknown  |
| <i>PAX5</i>   | NM_016734.2    | c.239C>G            | p.Pro80Arg              | missense    | 0.44 | somatic | Unknown  |
| <i>SETD2</i>  | NM_014159.6    | c.5735T>A           | p.Leu1912*              | nonsense    | 0.73 | somatic | Unknown  |
| <i>TP53</i>   | NM_000546.5    | c.1009C>T           | p.Arg337Cys             | missense    | 0.11 | somatic | Unknown  |
| <i>TP53</i>   | NM_000546.5    | c.846_847insGCCCAGG | p.Arg283Alafs*25        | frameshift  | 0.68 | somatic | Negative |
| <i>TP53</i>   | NM_000546.5    | c.716A>G            | p.Asn239Ser             | missense    | 0.53 | somatic | Unknown  |
| <i>TP53</i>   | NM_000546.5    | c.707A>G            | p.Tyr236Cys             | missense    | 0.43 | somatic | Unknown  |
| <i>CREBBP</i> | NM_004380.2    | c.5039_5041del      | p.Ser1680del            | inframe     | 0.41 | somatic | Unknown  |
| <i>KMT2D</i>  | NM_003482.3    | c.15784+2T>C        | p.?                     | splice_site | 0.44 | somatic | Unknown  |
| <i>MSH2</i>   | NM_000251.2    | c.2087C>T           | p.Pro696Leu             | missense    | 0.47 | somatic | Positive |
| <i>TP53</i>   | NM_000546.5    | c.845G>C            | p.Arg282Pro             | missense    | 0.81 | somatic | Unknown  |
| <i>TP53</i>   | NM_000546.5    | c.670G>A            | p.Glu224Lys             | missense    | 0.36 | somatic | Negative |
| <i>TP53</i>   | NM_000546.5    | c.738G>A            | p.Met246Ile             | missense    | 0.65 | somatic | Negative |
| <i>NF1</i>    | NM_001042492.2 | NA                  | exon_16_36              | deletion    | 0.5  | somatic | Unknown  |
| <i>TP53</i>   | NM_000546.5    | c.743G>C            | p.Arg248Pro             | missense    | 0.7  | somatic | Unknown  |
| <i>GATA2</i>  | NM_001145661.1 | c.1085G>A           | p.Arg362Gln             | missense    | 0.29 | somatic | Unknown  |
| <i>RUNX1</i>  | NM_001754.4    | c.634_635insT       | p.Asp212Valfs*16        | frameshift  | 0.2  | somatic | Unknown  |
| <i>RUNX1</i>  | NM_001754.4    | NA                  | exon_4_7                | deletion    | 0.5  | somatic | Unknown  |
| <i>TP53</i>   | NM_000546.5    | c.718A>G            | p.Ser240Gly             | missense    | 0.7  | somatic | Unknown  |
| <i>CDKN2A</i> | NM_000077.4    | c.172C>T            | p.Arg58*                | nonsense    | 0.41 | somatic | Negative |
| <i>TP53</i>   | NM_000546.5    | c.743G>A            | p.Arg248Gln             | missense    | 0.3  | somatic | Negative |
| <i>TP53</i>   | NM_000546.5    | c.817C>T            | p.Arg273Cys             | missense    | 0.39 | somatic | Negative |
| <i>CREBBP</i> | NM_004380.2    | c.4361T>G           | p.Leu1454Arg            | missense    | 0.67 | somatic | Unknown  |
| <i>MSH6</i>   | NM_000179.2    | c.1483C>T           | p.Arg495*               | nonsense    | 0.32 | somatic | Unknown  |
| <i>MSH6</i>   | NM_000179.2    | c.1444C>T           | p.Arg482*               | nonsense    | 0.3  | somatic | Unknown  |
| <i>TP53</i>   | NM_000546.5    | c.847delinsGAGGCGA  | p.Arg283delinsGluAlaSer | inframe     | 0.44 | somatic | Unknown  |
| <i>MSH6</i>   | NM_000179.2    | c.2731C>T           | p.Arg911*               | nonsense    | 0.47 | somatic | Unknown  |

|               |                |               |                  |            |      |         |          |
|---------------|----------------|---------------|------------------|------------|------|---------|----------|
| <i>NFI</i>    | NM_001042492.2 | c.574C>T      | p.Arg192*        | nonsense   | 0.41 | somatic | Unknown  |
| <i>PTPN11</i> | NM_002834.4    | c.172A>T      | p.Asn58Tyr       | missense   | 0.19 | somatic | Positive |
| <i>NFI</i>    | NM_001042492.2 | c.2033dup     | p.Ile679Aspfs*21 | frameshift | 0.66 | somatic | Unknown  |
| <i>RUNX1</i>  | NM_001754.4    | NA            | exon_3_5         | deletion   | 0.5  | somatic | Unknown  |
| <i>TP53</i>   | NM_000546.5    | c.743G>A      | p.Arg248Gln      | missense   | 0.68 | somatic | Negative |
| <i>TP53</i>   | NM_000546.5    | c.379T>C      | p.Ser127Pro      | missense   | 0.46 | somatic | Negative |
| <i>TP53</i>   | NM_000546.5    | c.427G>A      | p.Val143Met      | missense   | 0.41 | somatic | Negative |
| <i>CDKN2A</i> | NM_000077.4    | c.303_304insC | p.Ala102Argfs*18 | frameshift | 0.49 | TN      | Positive |



Figure Legends

**Supplemental Figure 1. Pedigrees of patients diagnosed with cancer predisposition syndromes, highlighting cascade testing.**  
Twelve family members in five pedigrees diagnosed with germline predisposition.

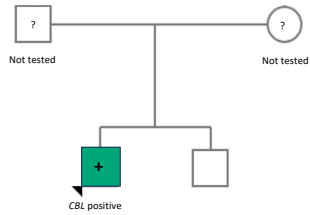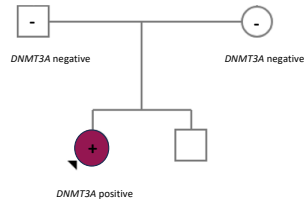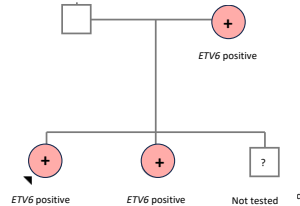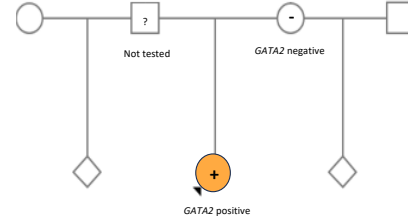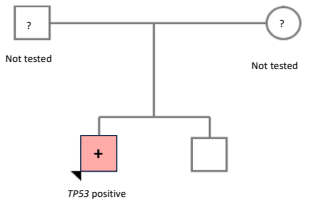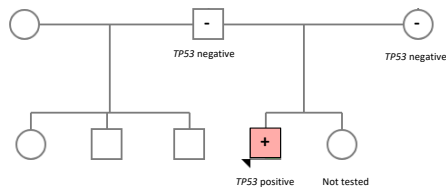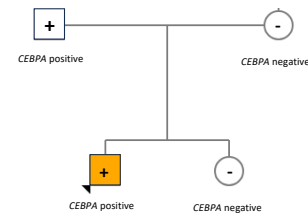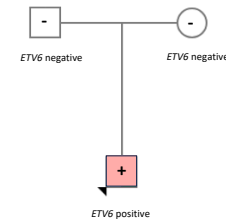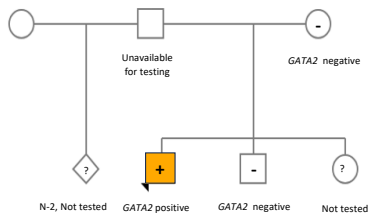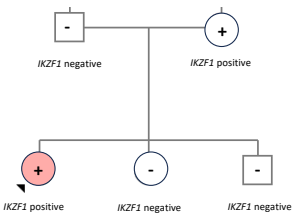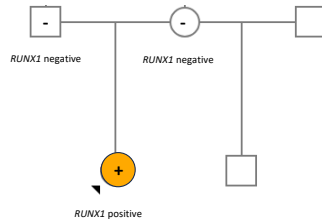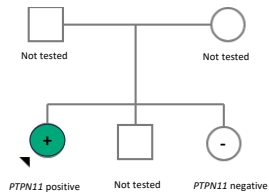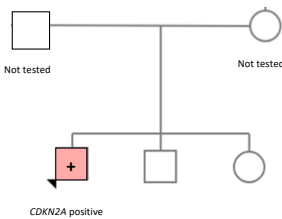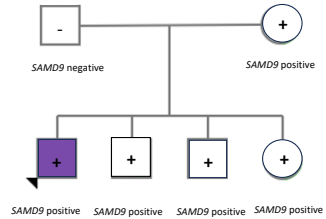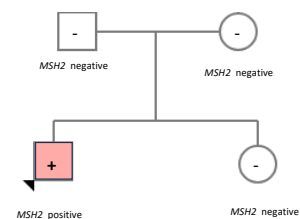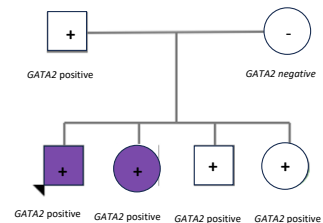

| Diagnosis       |                                            |
|-----------------|--------------------------------------------|
| +               | T-ALL                                      |
| +               | JMML                                       |
| +               | B-ALL                                      |
| +               | AML                                        |
| +               | MDS                                        |
| Genetic testing |                                            |
| +               | Positive                                   |
| -               | Negative                                   |
| ?               | Recommended for testing but not yet tested |
